# Supplementary material for: Dispersive non-noble metal phosphide embedded in alumina arrays derived from layered double hydroxide precursor toward efficient oxygen evolution reaction and biomass upgrading
Source: Royal Society of Chemistry journal article supplement (doi:10.1039/c9ta03580j), 2019-01-01
Supplement: c9ta03580j1.pdf [file c9ta03580j1.pdf]

## Supplementary Information

### **Dispersive non-noble metal phosphide embedded in alumina arrays derived from layered double hydroxide precursor toward efficient oxygen evolution reaction and biomass upgrading**

Mengyuan Li<sup>a,1</sup>, lifang Chen<sup>a,1</sup>, Shuteng Ye<sup>a</sup>, Guoli Fan<sup>a,\*</sup>, Lan Yang<sup>a</sup>, Xin Zhang<sup>a,\*</sup> and Feng Li<sup>a,b,\*</sup>

<sup>a</sup> State Key Laboratory of Chemical Resource Engineering, Beijing University of Chemical Technology, Box 98, Beijing 100029, China

<sup>b</sup> Beijing Advanced Innovation Center for Soft Matter Science and Engineering, Beijing University of Chemical Technology, Box 98, Beijing 100029, China

\* To whom all correspondence should be addressed

Tel.: 8610-64451226; Fax: 8610-64425385.

E-mail: [fangl@mail.buct.edu.cn](mailto:fangl@mail.buct.edu.cn) (G.L. Fan);

[Zhangxin@mail.buct.edu.cn](mailto:Zhangxin@mail.buct.edu.cn) (X. Zhang);

[Lifeng@mail.buct.edu.cn](mailto:Lifeng@mail.buct.edu.cn) (F. Li)

<sup>1</sup> These authors contributed equally to this work.

## Computational details of the thermodynamic mechanism of OER

The thermodynamic mechanism of OER in alkaline conditions which proposed by Norskov group are extensively used. The scheme of reaction elementary steps is as follows

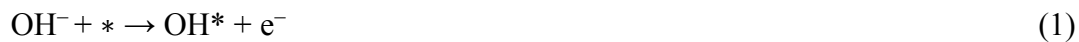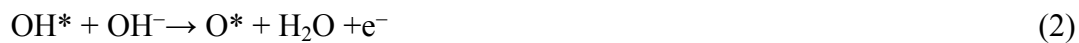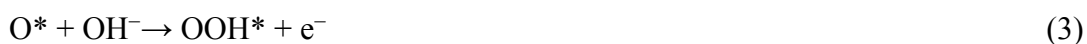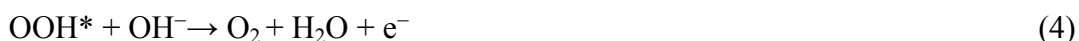

where ‘\*’ means the Ni(111), Ni<sub>2</sub>P(111) and clean surface. OH\*, O\* and OOH\* denote the species adsorbed on the surface. To be convenient, the steps (1)-(4) can be converted to the form in the acidic conditions which can be expressed as

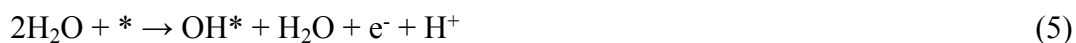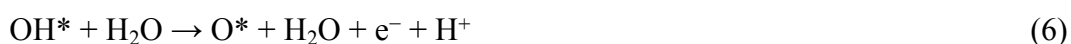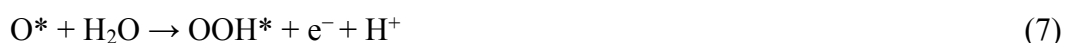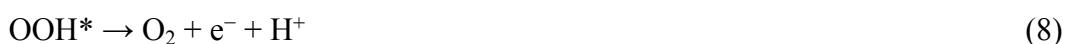

The steps (1)-(4) are equivalent to (5)-(8).

The Gibbs free energy changes for reaction (5)-(8) are calculated as

$$\Delta G_1 = \Delta G_{\text{OH}} - eU + kT \ln 10 \text{pH} \quad (9)$$

$$\Delta G_2 = \Delta G_{\text{O}^-} - \Delta G_{\text{OH}} - eU + kT \ln 10 \text{pH} \quad (10)$$

$$\Delta G_3 = \Delta G_{\text{OOH}} - \Delta G_{\text{O}} - eU + kT \ln 10 \text{pH} \quad (11)$$

$$\Delta G_4 = 4.92 [\text{eV}] - \Delta G_{\text{OOH}} - eU + kT \ln 10 \text{pH} \quad (12)$$

$G$  is the Gibbs free energy, and  $U$  is the external bias against normal hydrogen electrode (NHE) at standard conditions ( $T = 298.15 \text{ K}$ ,  $P = 1 \text{ bar}$ ,  $\text{pH} = 0$ ). Therefore, here,  $eU$  and  $\text{pH}$  are 0. Due to the Gibbs free energy of formation of two water molecules is  $4 \times 1.23 = 4.92 \text{ eV}$ , the sum of  $\Delta G_1, \Delta G_2, \Delta G_3, \Delta G_4$  is fixed to  $4.92 \text{ eV}$ . The reaction Gibbs free energy is calculated from the adsorption energy of OH\*, O\* and OOH\*, according to  $\Delta G_i = \Delta E_i + \Delta \text{ZPE}_i - T \Delta S_i$ . The energy differences  $\Delta E_i$  calculated against H<sub>2</sub>O and H<sub>2</sub> are calculated as

$$\Delta E_{\text{OH}} = E(\text{OH}^*) - E(*) - [E(\text{H}_2\text{O}) - 1/2E(\text{H}_2)] \quad (13)$$

$$\Delta E_{\text{O}} = E(\text{O}^*) - E(*) - [E(\text{H}_2\text{O}) - E(\text{H}_2)] \quad (14)$$

$$\Delta E_{\text{OOH}} = E(\text{OOH}^*) - E(*) - [2E(\text{H}_2\text{O}) - 3/2E(\text{H}_2)] \quad (15)$$

The theoretical overpotential is defined as:

$$\eta = \max[\Delta G_1, \Delta G_2, \Delta G_3, \Delta G_4]/e - 1.23 \text{ [V]} \quad (16)$$

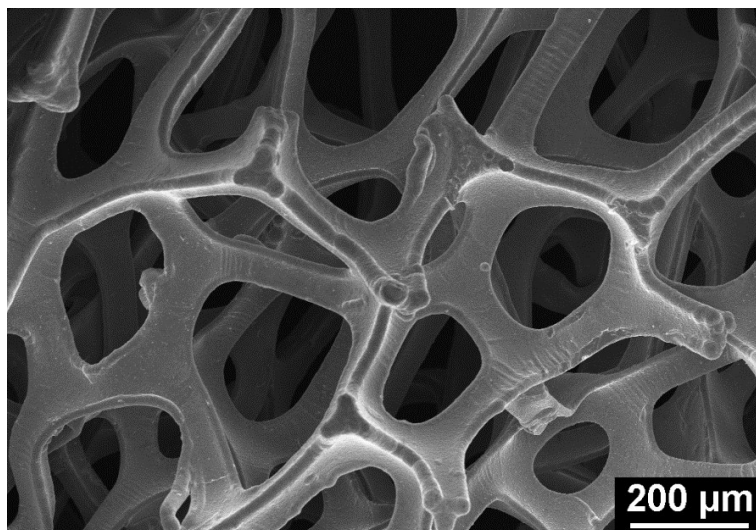

**Fig. S1** SEM image of NF

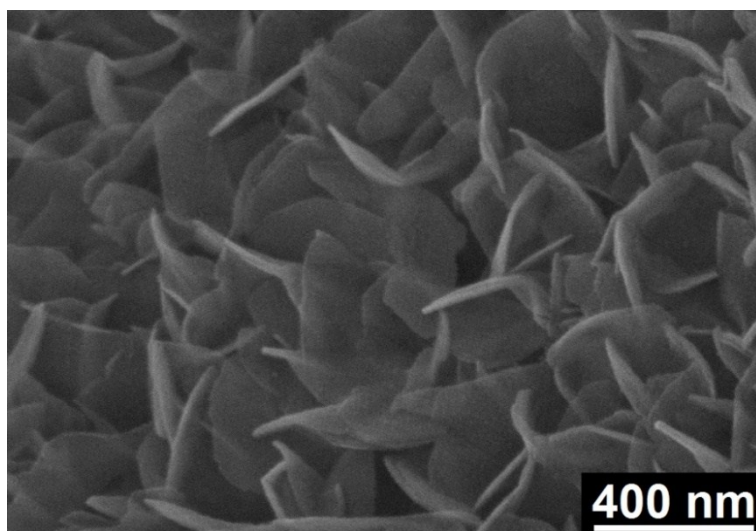

**Fig. S2** SEM image of NiAl-HPO<sub>4</sub>-LDH/NF intermediate.

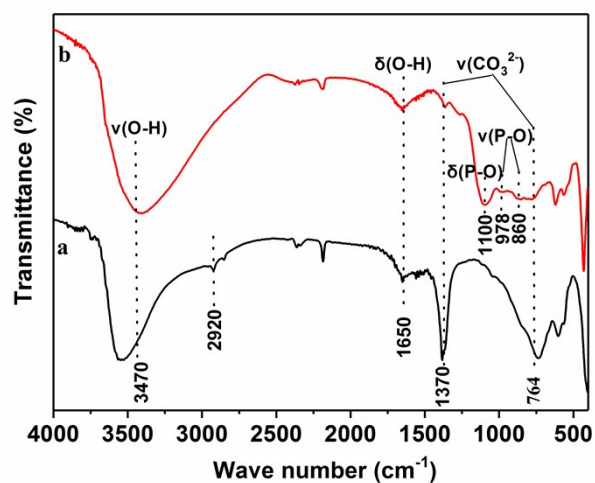

**Fig. S3** FT-IR spectrum of NiAl-PO<sub>4</sub>-LDH/NF intermediate.

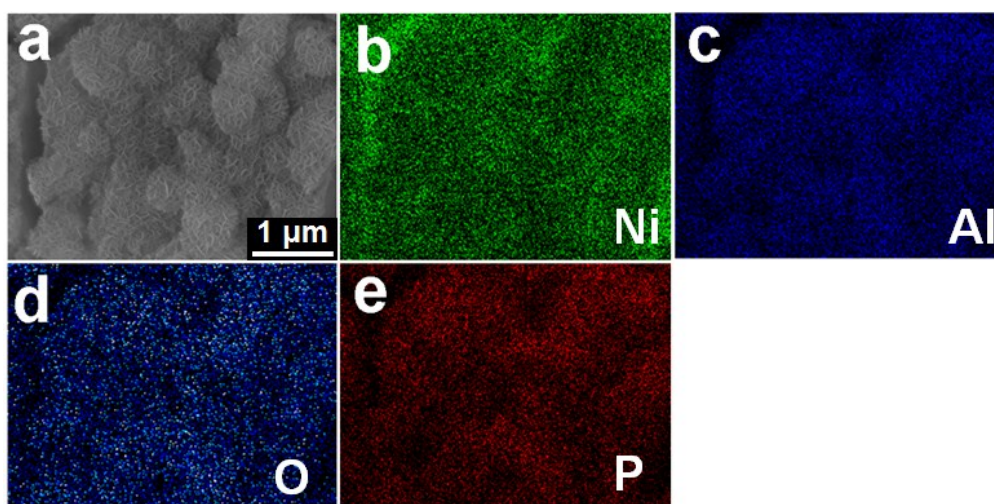

**Fig. S4** a) SEM image a) and b-d) elemental mapping images of Ni, Al, O, and P of NiAl-HPO<sub>4</sub>-LDH/NF intermediate

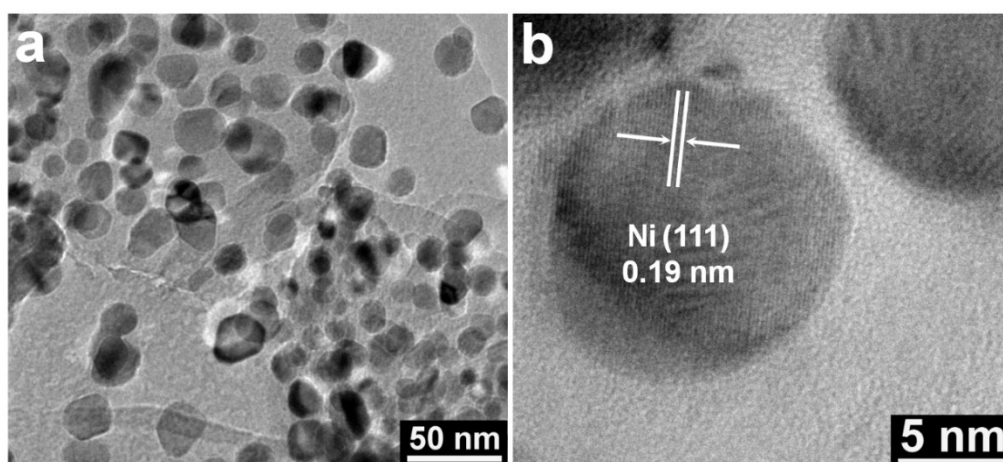

**Fig. S5** a) TEM and b) HRTEM images of Ni-Al<sub>2</sub>O<sub>3</sub>/NF sample

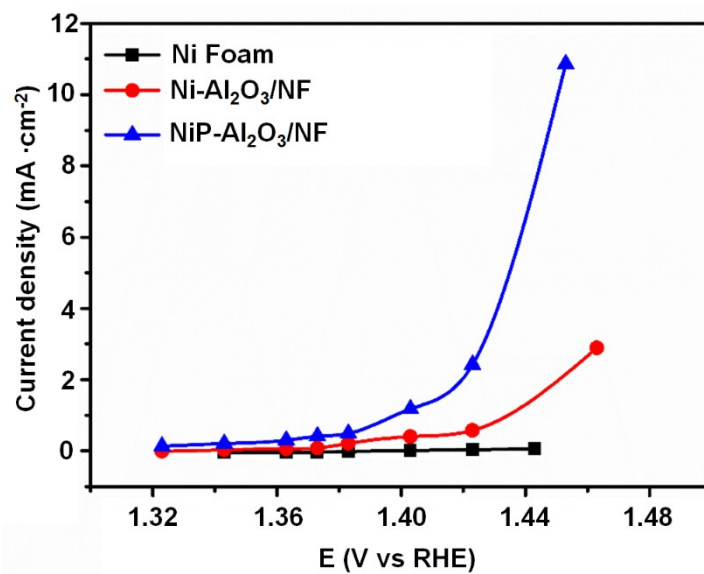

**Fig. S6** Partial LSV curves separated of NF, Ni-Al<sub>2</sub>O<sub>3</sub>/NF, NiP-Al<sub>2</sub>O<sub>3</sub>/NF in 1.0 mol L<sup>-1</sup> KOH from oxidation peaks by i-t tests.

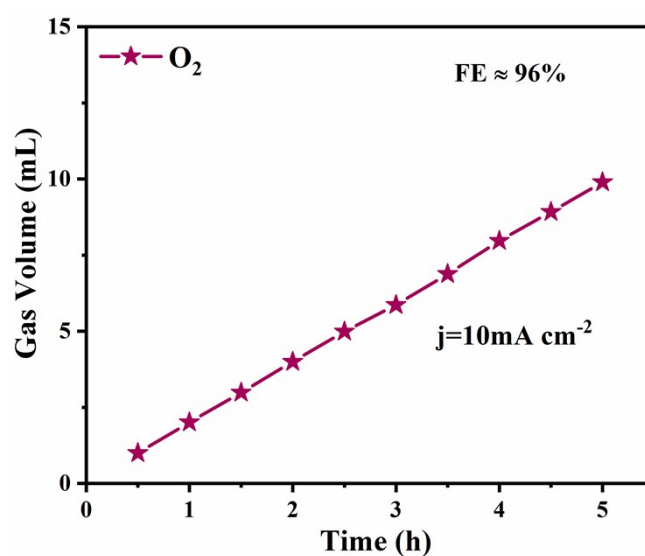

**Fig. S7** The amount of O<sub>2</sub> versus time at a constant current density of 10 mA cm<sup>-2</sup> in 1 M KOH.

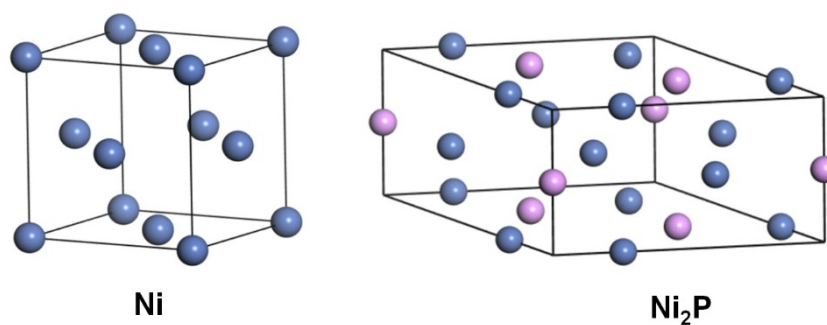

**Fig. S8** The optimized primitive cell of Ni and Ni<sub>2</sub>P.

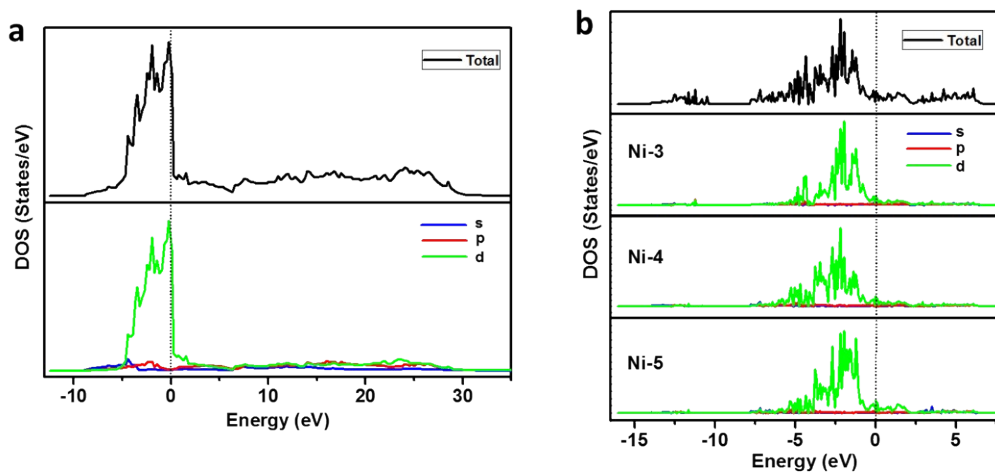

**Fig. S9** The total and projected density of states of a) Ni and b) Ni<sub>2</sub>P. Ni-n (n=3, 4, 5), and n means the different coordination number of Ni in Ni<sub>2</sub>P (111).

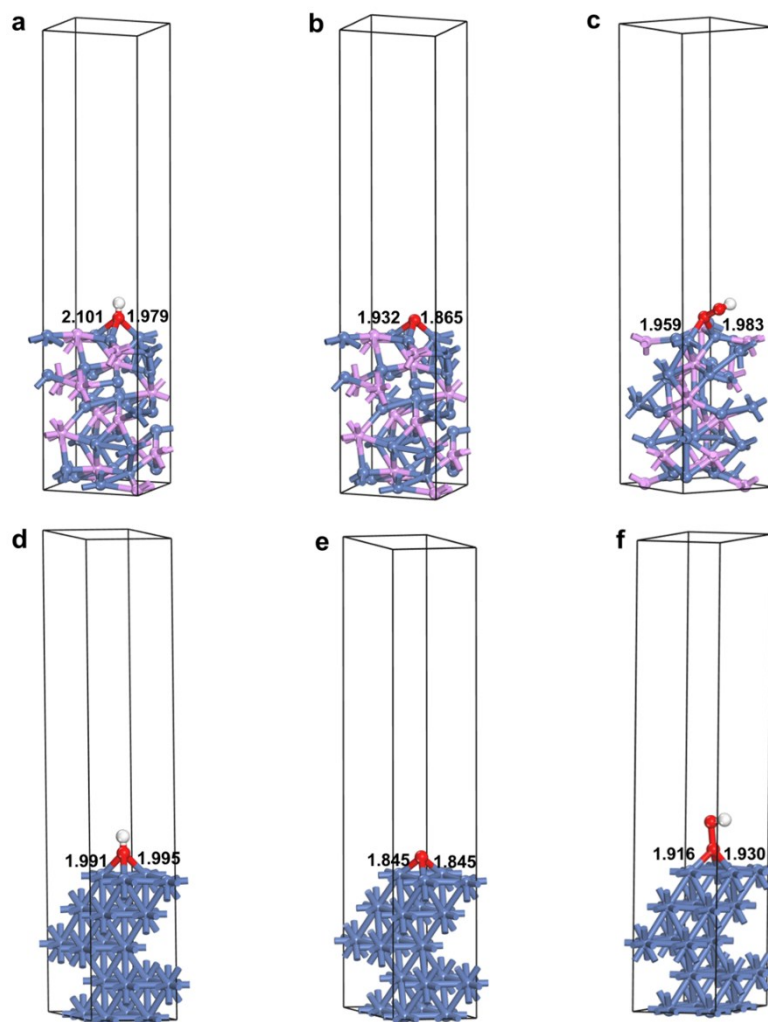

**Fig. S10** Different species (\*OH, \*O, \*OOH) combined with (a-c) Ni<sub>2</sub>P and (d-e) Ni. The Ni-O bond lengths (unit: Å) are labeled in Fig., respectively.

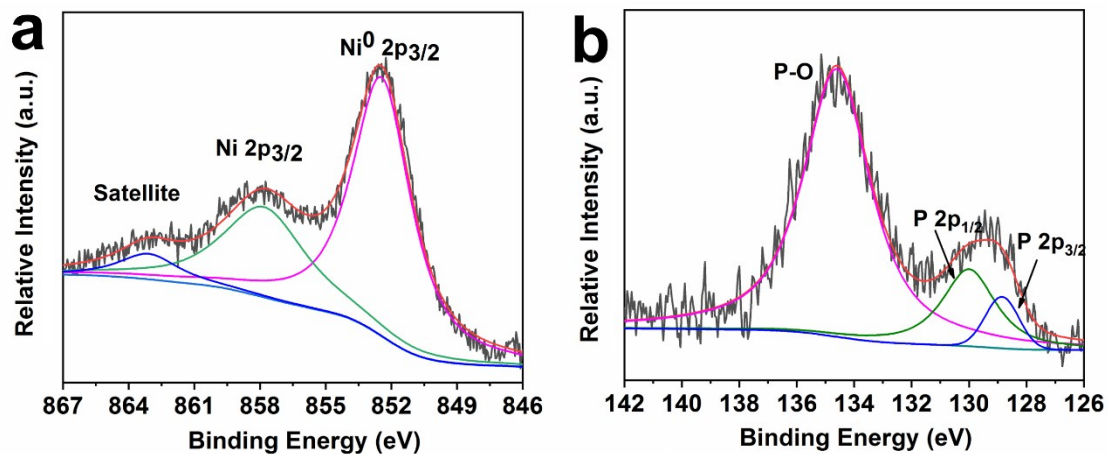

Fig. S11 a) Ni 2p and b) P 2p XPS of NiP-Al<sub>2</sub>O<sub>3</sub>/NF after chronopotentiometry test.

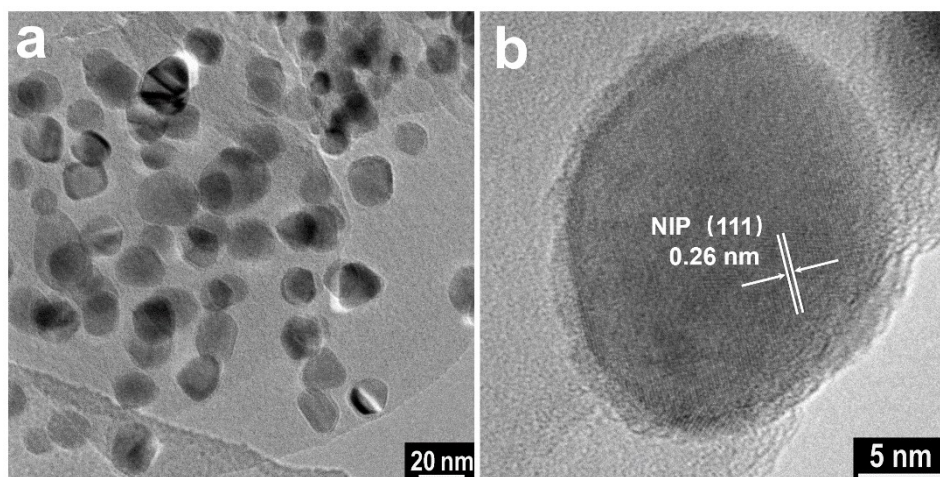

Fig. S12 a) TEM and b) HRTEM images of NiP-Al<sub>2</sub>O<sub>3</sub>/NF after chronopotentiometry test.

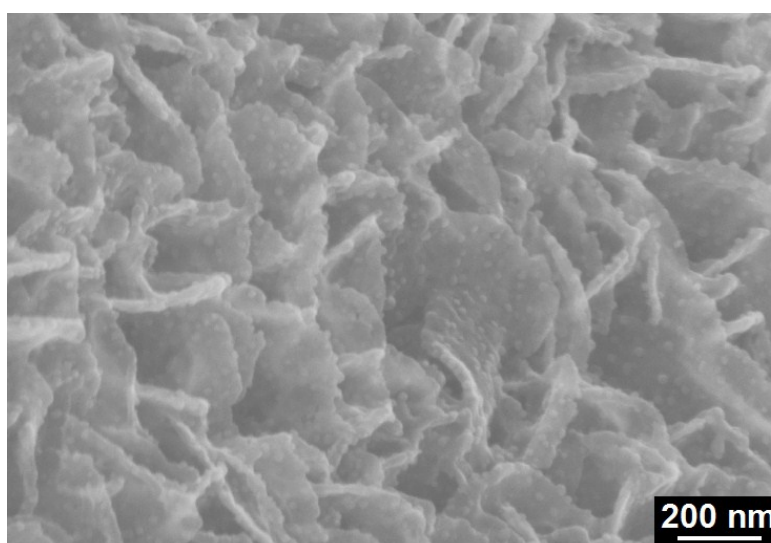

Fig. S13 SEM image of NiP-Al<sub>2</sub>O<sub>3</sub>/NF after five successive cycles of electrocatalytic oxidation of HMF.

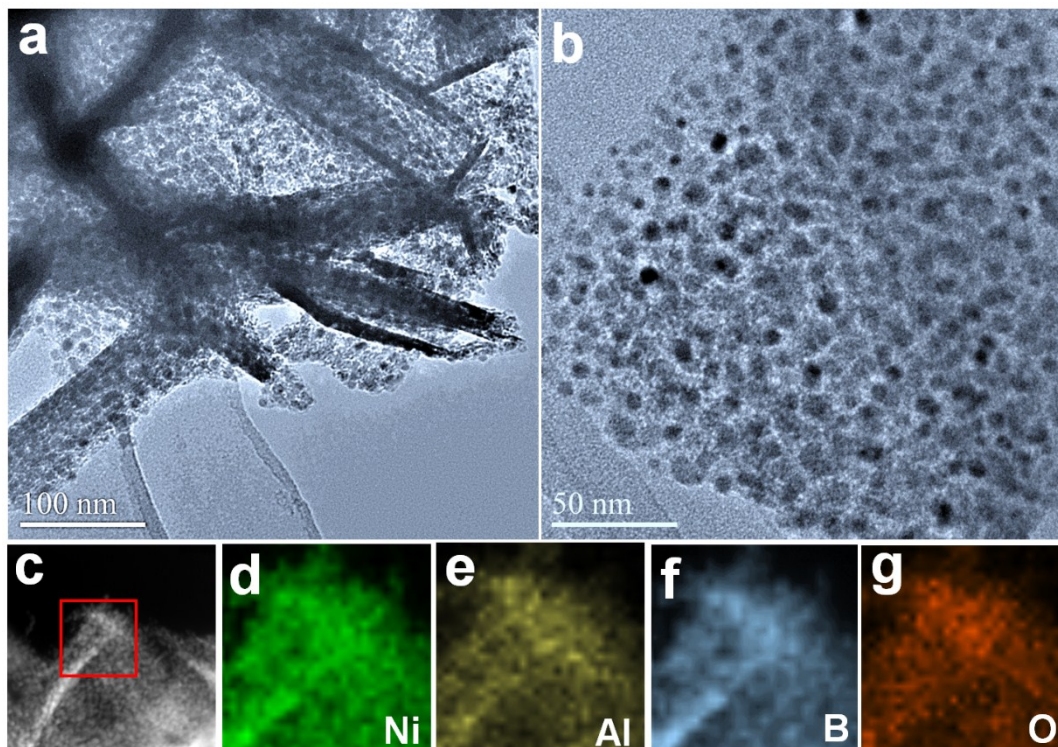

**Fig. S14** a, b) TEM images of NiB-Al<sub>2</sub>O<sub>3</sub>/NF. c-g) HAADF-STEM image and elemental mapping images of Ni, Al, B, and O of NiB-Al<sub>2</sub>O<sub>3</sub>/NF, respectively.

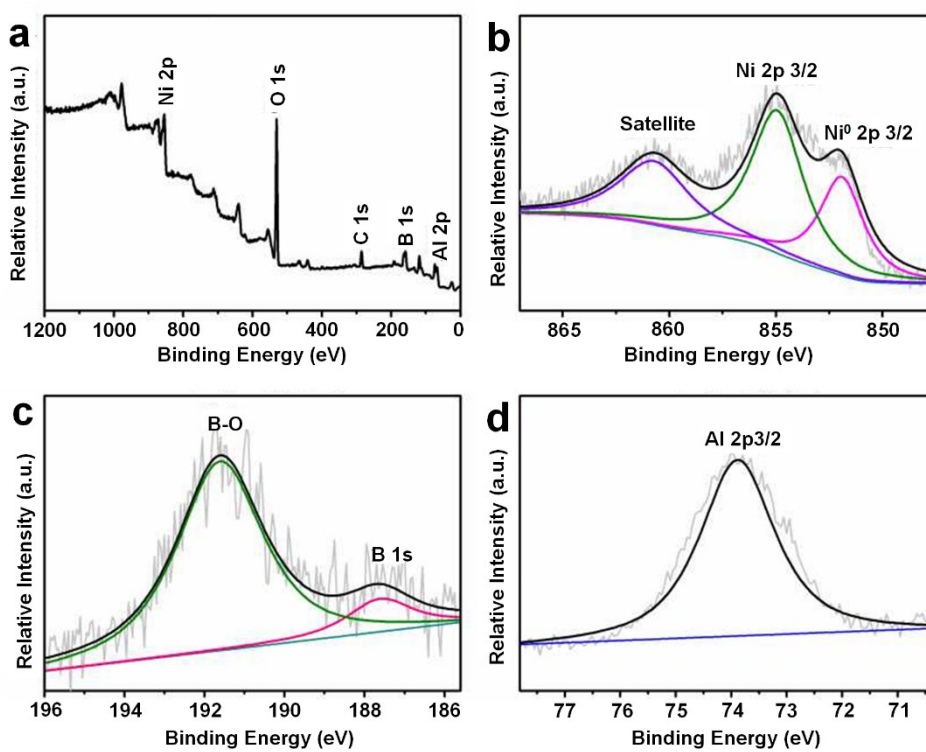

**Fig. 15** XPS spectra of NiB-Al<sub>2</sub>O<sub>3</sub>/NF sample: a) survey, b) Ni 2p, c) B 1s, and d) Al 2p



**Table 1.** Comparison of OER activities over various electrocatalysts.

| Material                                               | Electrolyte | Current density [mA cm <sup>-2</sup> ] | Over-potential [mV] | Refs.            |
|--------------------------------------------------------|-------------|----------------------------------------|---------------------|------------------|
| Ni-P/CF                                                | 1.0 M KOH   | 10                                     | 325                 | 1                |
| Ni-P NA/NF                                             | 1.0 M KOH   | 20                                     | 311                 | 2                |
| f-CoP/CoP <sub>2</sub> /Al <sub>2</sub> O <sub>3</sub> | 1.0 M KOH   | 10                                     | 300                 | 3                |
| Ni(OH) <sub>2</sub> /NF                                | 1.0 M KOH   | 50                                     | 330                 | 4                |
| NiSe-NiO <sub>x</sub> /NF                              | 1.0 M KOH   | 10                                     | 243                 | 5                |
| Ni <sub>1.5</sub> Fe <sub>0.5</sub> P                  | 1.0 M KOH   | 10                                     | 264                 | 6                |
| NiP <sub>2</sub> /CC                                   | 1.0 M KOH   | 20                                     | 310                 | 7                |
| CF@NiP <sub>x</sub>                                    | 1.0 M KOH   | 10                                     | 200                 | 8                |
| NiSe/NF                                                | 1.0 M KOH   | 20                                     | 270                 | 9                |
| NiP <sub>0.62</sub> S <sub>0.38</sub>                  | 1.0 M KOH   | 10                                     | 240                 | 10               |
| Ni <sub>2</sub> P-Al <sub>2</sub> O <sub>3</sub> /NF   | 1.0 M KOH   | 10                                     | 193                 | <b>This work</b> |
| Ni <sub>2</sub> P-Al <sub>2</sub> O <sub>3</sub> /NF   | 1.0 M KOH   | 20                                     | 224                 | <b>This work</b> |
| Ni <sub>2</sub> P-Al <sub>2</sub> O <sub>3</sub> /NF   | 1.0 M KOH   | 50                                     | 258                 | <b>This work</b> |

## References for SI

- 1 Q. Liu, S. Gu and C. M. Li, *J. Power Sources*, 2015, **299**, 342-346.
- 2 J. Xiao, Q. Y. Lv, Y. Zhang, Z.Y. Zhang and S. Wang, *RSC Adv.*, 2016, **6**, 107859-107864.
- 3 W. Li, S. L. Zhang, Q. Fan, F. Z. Zhang and S. L. Xu, *Nanoscale* 2017, **9**, 5677-5658.
- 4 J. S. Luo, J. H. Im, M. T. Mayer, M. Schreier, M. K. Nazeeruddin, N. G. Park, S. D. Tilley, H. J. Fan and M. Grätzel, *Science*, 2014, **345**, 1593-1596.
- 5 R. Q. Gao, G. D. Li, J. B. Hu, Y. Y. Wu, X. R. Lian, D. J. Wang and X. X. Zou, *Catal. Sci. Technol.*, 2016, **6**, 8268-8275.
- 6 H. W. Huang, C. Yu, C. T. Zhao, X. T. Han, J. Yang, Z. B. Liu, S. F. Li, M. D. Zhang and J. H. Qiu, *Nano Energy*, 2017, **3**, 2211-2855.
- 7 Z. H. Pu, Y. Xue, W. Q. Li, I. S. Amiin and S. C. Mu, *New J. Chem.*, 2017, **41**, 2154-2159.
- 8 Z. Y. Zhang, S. S. Liu, J. Xiao and S. Wang, *J. Mater. Chem. A*, 2016, **4**, 9691-9716.

- 9 C. Tang, N. Y. Cheng, Z. H. Pu, W. Xing and X. P. Sun, *Angew. Chem., Int. Ed.*, 2015, **54**, 9351-9355.
- 10 J. Luo, H. Y. Wang, G. Su, Y. L. Tang, H. Q. Liu, F. Y. Tian and D. L. Li, *J. Mater. Chem. A*, 2017, **5**, 14865-14872.
